# Supplementary material for: Simultaneous detection of single-nucleotide polymorphisms in a DNA bulge structure using a fluorine-modified bisbenzimide derivative
Source: Royal Society of Chemistry journal article supplement (doi:10.1039/c5an02389k), 2015-12-09
Supplement: c5an02389k1.pdf [file c5an02389k1.pdf]

## Supplementary Information

### **Simultaneous detection of single-nucleotide polymorphisms in a DNA bulge structure using fluorine-modified bisbenzimidazole derivative**

Takashi Sakamoto,<sup>\*a</sup> Daisaku Hasegawa<sup>a</sup> and Kenzo Fujimoto<sup>\*a</sup>,

<sup>a</sup>School of Materials Science, Japan Advanced Institute of Science and Technology, 1-1 Asahi-dai, Nomi, Ishikawa 923-1292, Japan

#### **Contents**

|                                        |           |
|----------------------------------------|-----------|
| <b>1. Experimental Procedures</b>      | <b>S2</b> |
| <b>2. Supporting Table and Figures</b> | <b>S3</b> |

## 1. Experimental Procedures

**ODNs and other reagents:** All oligodeoxyribonucleotides were purchased from Fasmac (Japan). 3,5-Bis(trifluoromethyl)benzene-modified bisbenzimidazole H33258 was prepared according to a literature method.<sup>1</sup> Other reagents were purchased from Sigma-Aldrich (CA), Wako Pure Chemical Industry (Osaka, Japan) or TCI (Tokyo, Japan).

**<sup>19</sup>F NMR measurement:** <sup>19</sup>F NMR spectra were recorded using AVANCE III 500 MHz NMR spectrometer (Bruker Biospin) equipped with a 5 mm probe head (PA BBO 500S2 BBF-H-D-05 Z, Bruker Biospin) at 470 MHz for <sup>19</sup>F. The chemical shifts were corrected using TFA (−75.6 ppm) as an internal standard.

**Fluorescence measurement:** Fluorescence spectra were recorded using FP-6500 spectrofluorophotometer (JASCO, Tokyo, Japan) with excitation at 345 nm.

**Reversed-phase ultra-high performance liquid chromatographic analysis:** 2'-Deoxyribonucleosides (50 μM aq. soln.; 15 μL) were analyzed with a UPLC system (Aquity, Waters) equipped with BEH Shield RP18 column (1.7 μm, 2.1 × 50 mm), elution was with 0.05 M ammonium formate containing 0 to 0.5% CH<sub>3</sub>CN, linear gradient (8 min) at a flow rate of 0.2 mL/min, 60 °C). UV absorbance chromatograms were recorded at wavelength of 260 nm.

**Evaluation of partition coefficient (*P*<sub>OW</sub>):** A solution of 2'-deoxyribonucleosides (200 μM in 50 mM Tris-HCl (pH 7.6) containing 100 mM NaCl; 2 mL) was mixed with 1-octanol (2 mL) that was presaturated with same buffer in a sample tube. After shaking 100 times at room temperature, the tube was centrifuged (1500 rpm, 5 min). UV absorbance at 260 nm of the aqueous layer was measured by spectrophotometer (V-630bio, JASCO) and *P*<sub>OW</sub> was calculated with the equation below;

$$P_{OW} = (A_0 - A_1) / A_0$$

where, *A*<sub>0</sub> and *A*<sub>1</sub> is the absorbance at 260 nm of the nucleoside solution before and after octanol treatment, respectively.

## 2. Supporting Table and Figures

**Table 1. Octanol-water partition coefficients ( $P_{ow}$ ) of 2'-deoxyribonucleosides**

|    | $P_{ow}$ |
|----|----------|
| dC | 0.035    |
| dG | 0.044    |
| dT | 0.076    |
| dA | 0.236    |

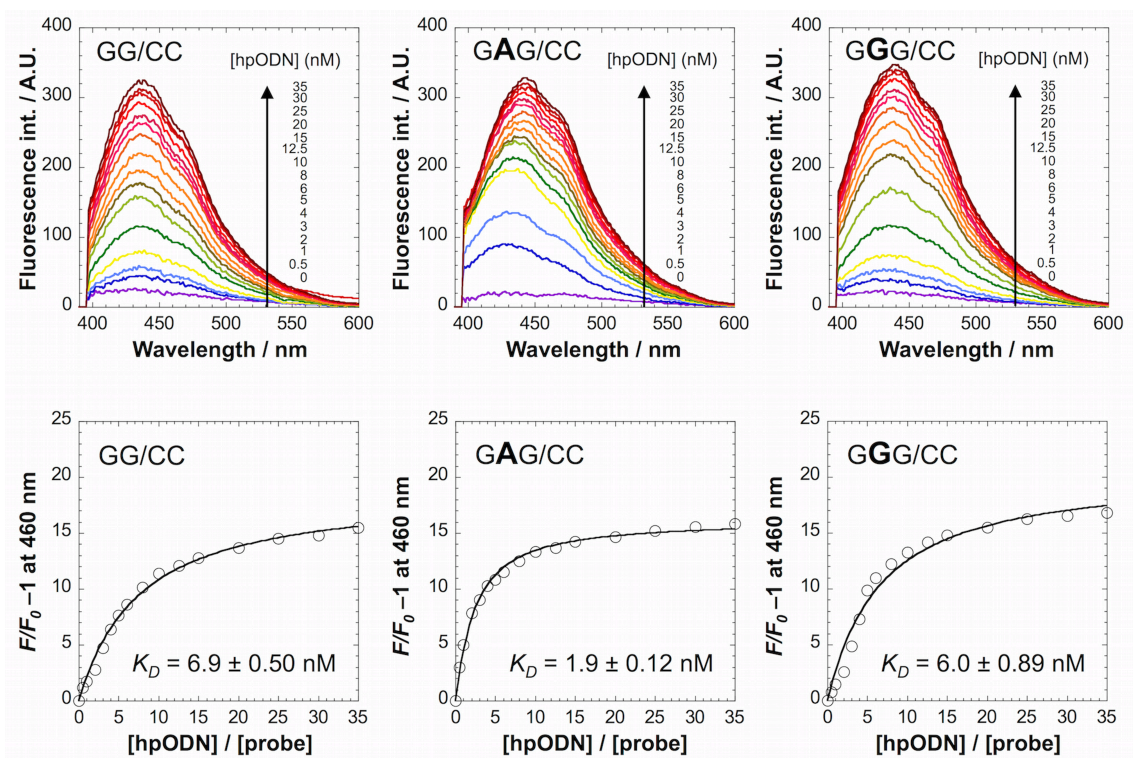

**Fig. S1** Fluorescence spectra and fluorescence titration curves of the probe versus hpODNs. [probe] = 1 nM in 50 mM Tris-HCl (pH 7.6) containing 100 mM NaCl. Measurements were performed at 25°C. Fluorescence intensity at 460 nm was used for preparing titration curves and  $K_D$  values were calculated with non-linear least square fitting.

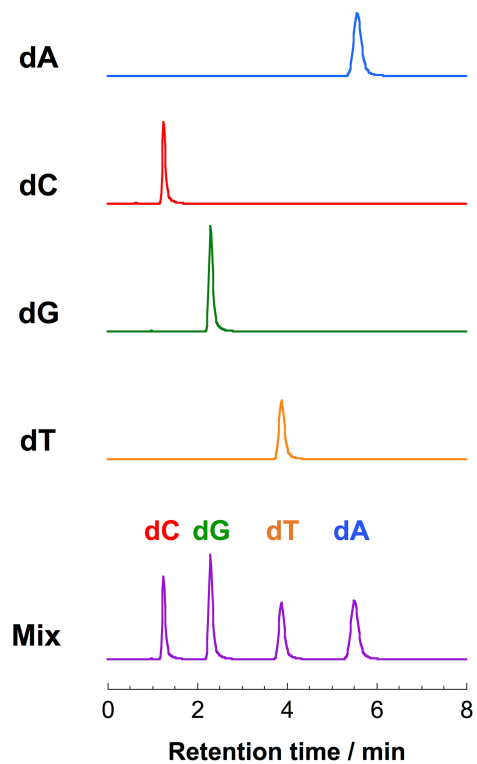

**Fig. S2** Reversed-phase ultra-high performance liquid chromatographic analysis of 2'-deoxyribonucleosides. Aqueous solutions of 2'-deoxyribonucleosides (50  $\mu$ M each) were subjected to the analysis.

## References

1. T. Sakamoto, D. Hasegawa and K. Fujimoto, *Chem. Commun.*, 2015, **51**, 8749.
